# Supplementary material
Source: PubMed Central journal article supplement (PMC9108667)
Supplement: EMBJ-41-e109523-s002.pdf [file EMBJ-41-e109523-s002.pdf]

## Expanded View Figures

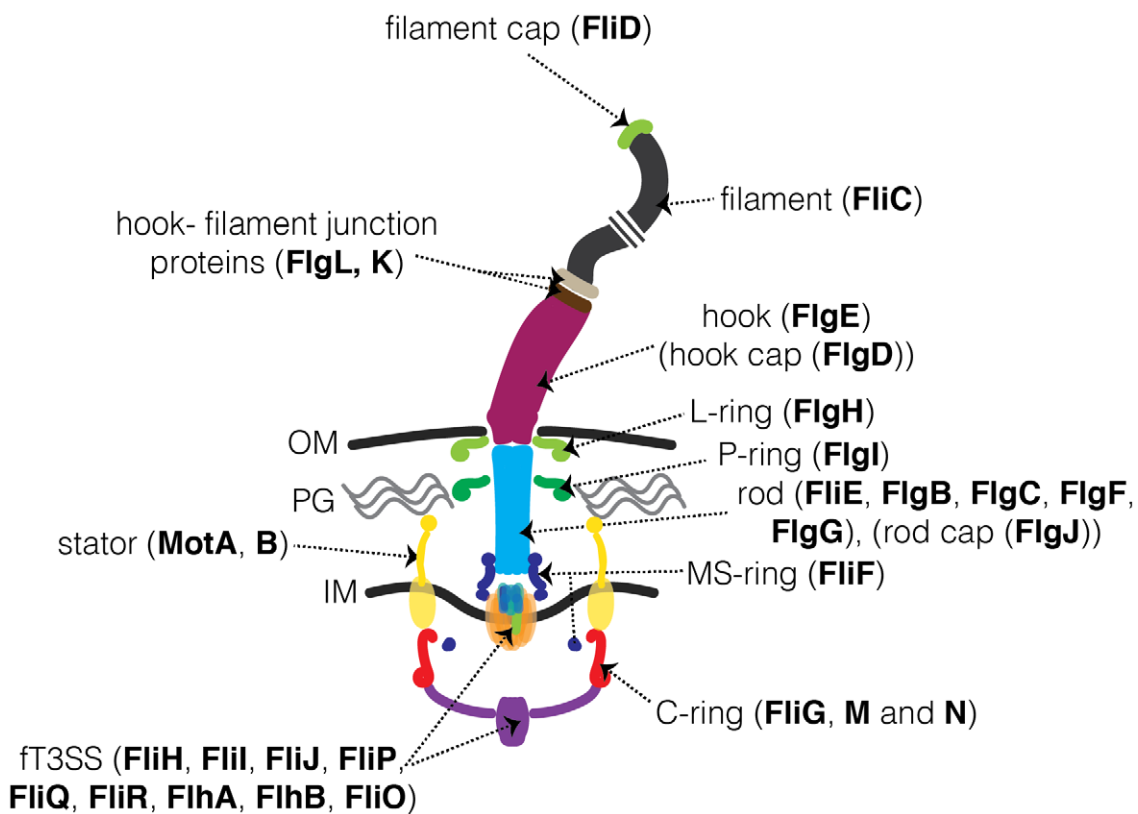

**Figure EV1. Schematic of the *Escherichia coli* flagellar motor.**

A schematic representation of the *E. coli* flagellum highlighting its major parts and their constituent proteins. The same color code is used in all main and supplemental figures, except Appendix Fig S3.

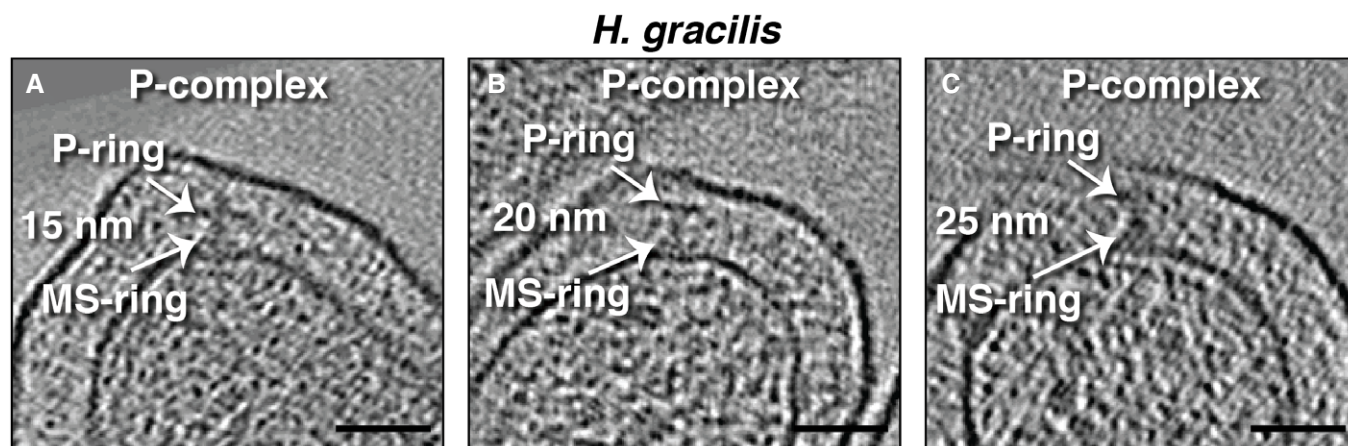

**Figure EV2. The variable position of the P-ring in *Hylemonella gracilis* P-complexes.**

A–C Slices through electron cryotomograms of *H. gracilis* showing P-complexes. The variable distance between the MS- and P-rings is indicated (15, 20 and 25 nm, respectively). Scale bars are 50 nm.

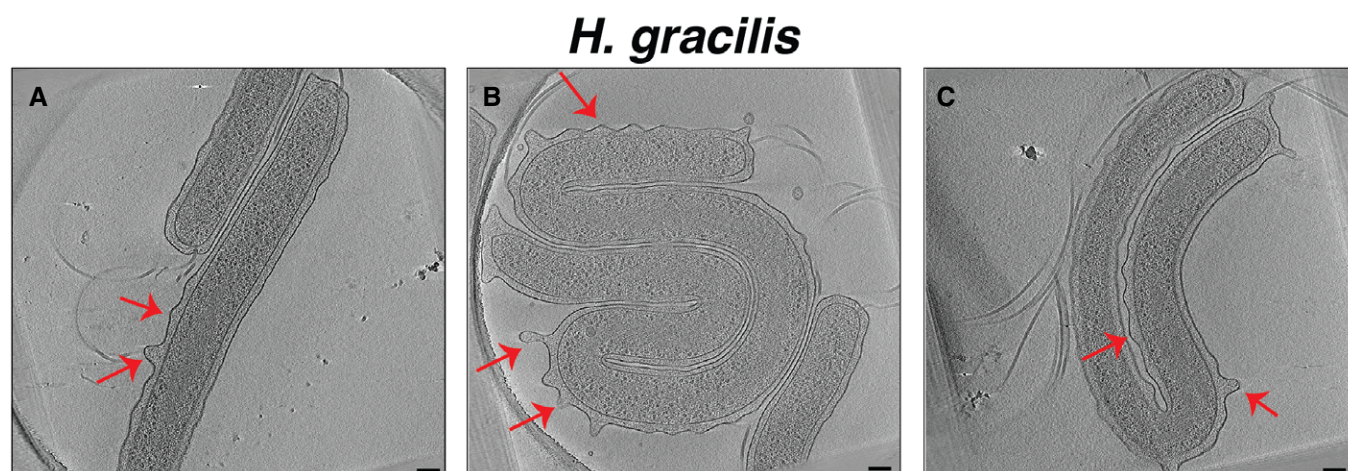

**Figure EV3. The undulating outer membrane of *Hylemonella gracilis*.**

A–C Slices through electron cryotomograms of *H. gracilis* highlighting undulating OM (indicated by red arrows). Scale bars are 100 nm.

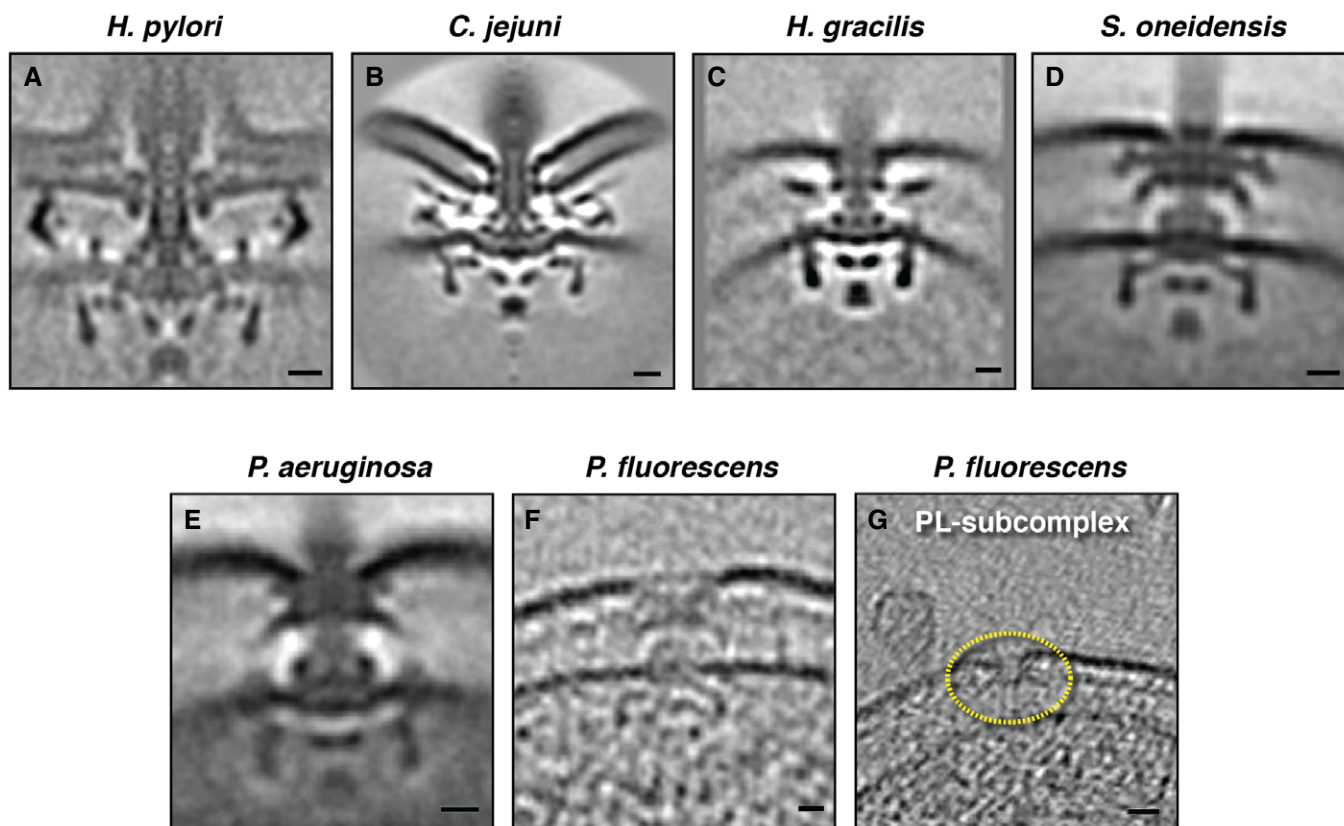

**Figure EV4. The flagellar motors of the species investigated in this study.**

A–E Central slices through the STAs of fully assembled high-torque motors in species in which we identified novel cytoplasmic rings interacting with the FlIG ring during assembly. The *H. pylori* motor is from (Qin *et al*, 2017), *C. jejuni* motor from (Beeby *et al*, 2016), *S. oneidensis* and *P. aeruginosa* motors from (Kaplan *et al*, 2019a).

F, G Slices through electron cryotomograms of *P. fluorescens* highlighting the presence of a basal body (F) and a disassembly PL-subcomplex (G, yellow dotted circle), showing the similarity of the motor of this species to that of *P. aeruginosa*.

Data information: Scale bars (A–F) 10 nm, (G) 20 nm.

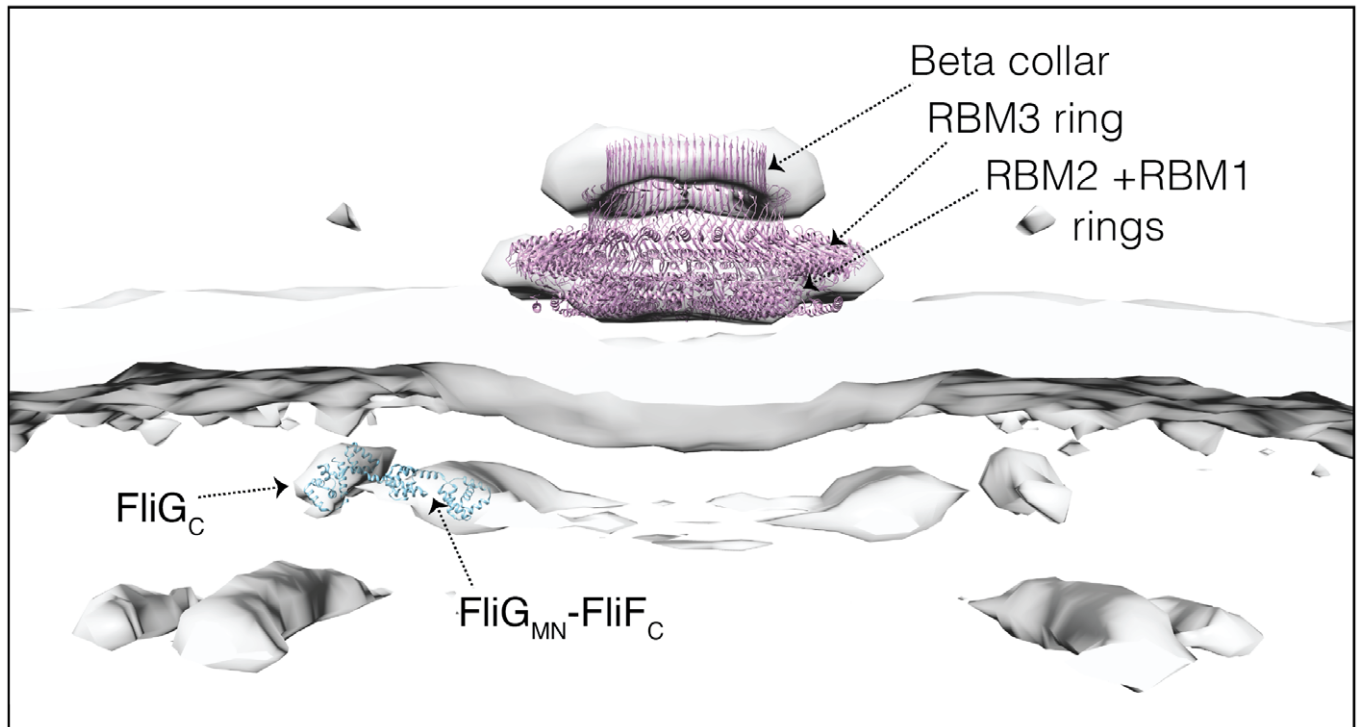

**Figure EV5.** Tentative component assignment to various MS-complex rings in *Helicobacter pylori*.

Surface rendering of the MS-complex of *H. pylori* *fliP*<sup>\*</sup> with the crystal structures of *Aquifex aeolicus* FliG (PDB 3HJL) and *S. enterica* MS-ring (PDB 6SCN) docked inside it. RBM, ring-building motif.
