# Supplementary material
Source: PubMed Central journal article supplement (PMC9108667)
Supplement: EMBJ-41-e109523-s006.pdf [file EMBJ-41-e109523-s006.pdf]

1 **Appendix file for**

2 **Novel transient cytoplasmic rings stabilize assembling bacterial**  
3 **flagellar motors**

4 Mohammed Kaplan<sup>1</sup>, Catherine M. Oikonomou<sup>1</sup>, Cecily R. Wood<sup>2</sup>, Georges Chreifi<sup>1</sup>, Poorna  
5 Subramanian<sup>1</sup>, Davi R. Ortega<sup>1</sup>, Yi-Wei Chang<sup>3</sup>, Morgan Beeby<sup>4</sup>, Carrie L. Shaffer<sup>2,5,6</sup>, Grant J.  
6 Jensen<sup>1,7,8</sup>

8 **Affiliations**

9 <sup>1</sup>Division of Biology and Biological Engineering, California Institute of Technology, Pasadena, CA 91125, USA

10 <sup>2</sup>University of Kentucky Department of Veterinary Science

11 <sup>3</sup>Department of Biochemistry and Biophysics, Perelman School of Medicine, University of Pennsylvania,  
12 Philadelphia, PA 19104, USA

13 <sup>4</sup>Department of Life Sciences, Imperial College London, South Kensington Campus, London SW7 2AZ, UK

14 <sup>5</sup>University of Kentucky Department of Microbiology, Immunology, and Molecular Genetics

15 <sup>6</sup>University of Kentucky Department of Pharmaceutical Sciences

16 <sup>7</sup>Department of Chemistry and Biochemistry, Brigham Young University, Provo, UT 84604, USA

17 <sup>8</sup>Corresponding author: jensen@caltech.edu

18

19

20

21

22

23

24

25

26

|    |                           |
|----|---------------------------|
| 27 | <b>Table of contents:</b> |
| 28 | Appendix figures 1-6      |
| 29 | Appendix references       |
| 30 |                           |
| 31 |                           |
| 32 |                           |
| 33 |                           |
| 34 |                           |
| 35 |                           |
| 36 |                           |
| 37 |                           |
| 38 |                           |
| 39 |                           |
| 40 |                           |
| 41 |                           |
| 42 |                           |
| 43 |                           |
| 44 |                           |
| 45 |                           |
| 46 |                           |
| 47 |                           |
| 48 |                           |
| 49 |                           |

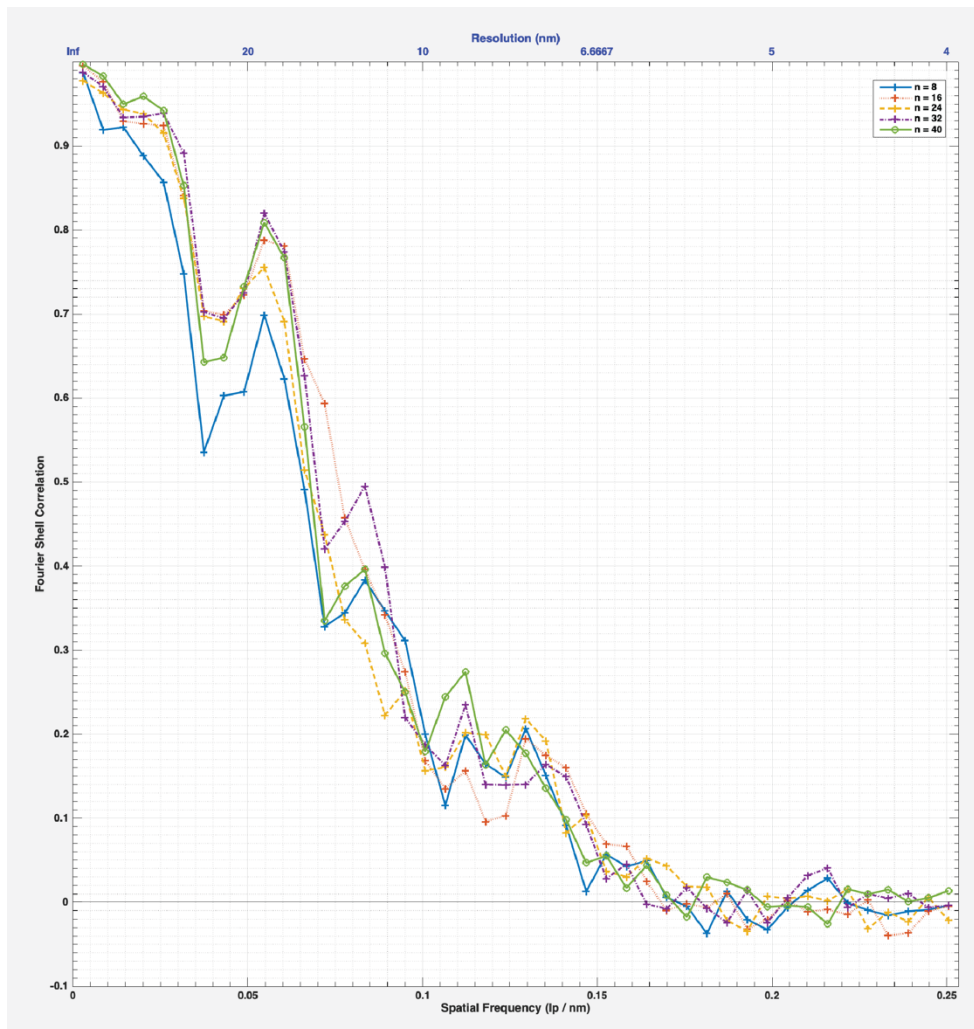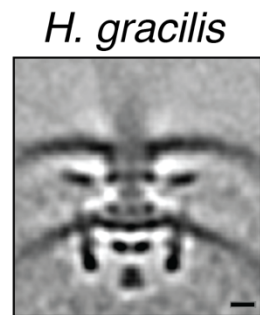

50

51 **Appendix Figure S1: FSC curve of the *H. gracilis* flagellar motor.**

52 FSC curve of the subtomogram average of the fully-assembled motor of *H. gracilis* (shown on the

53 right). The different colored curves represent different particle subsets. Scale bar is 10 nm.

54

55

56

57

58

59

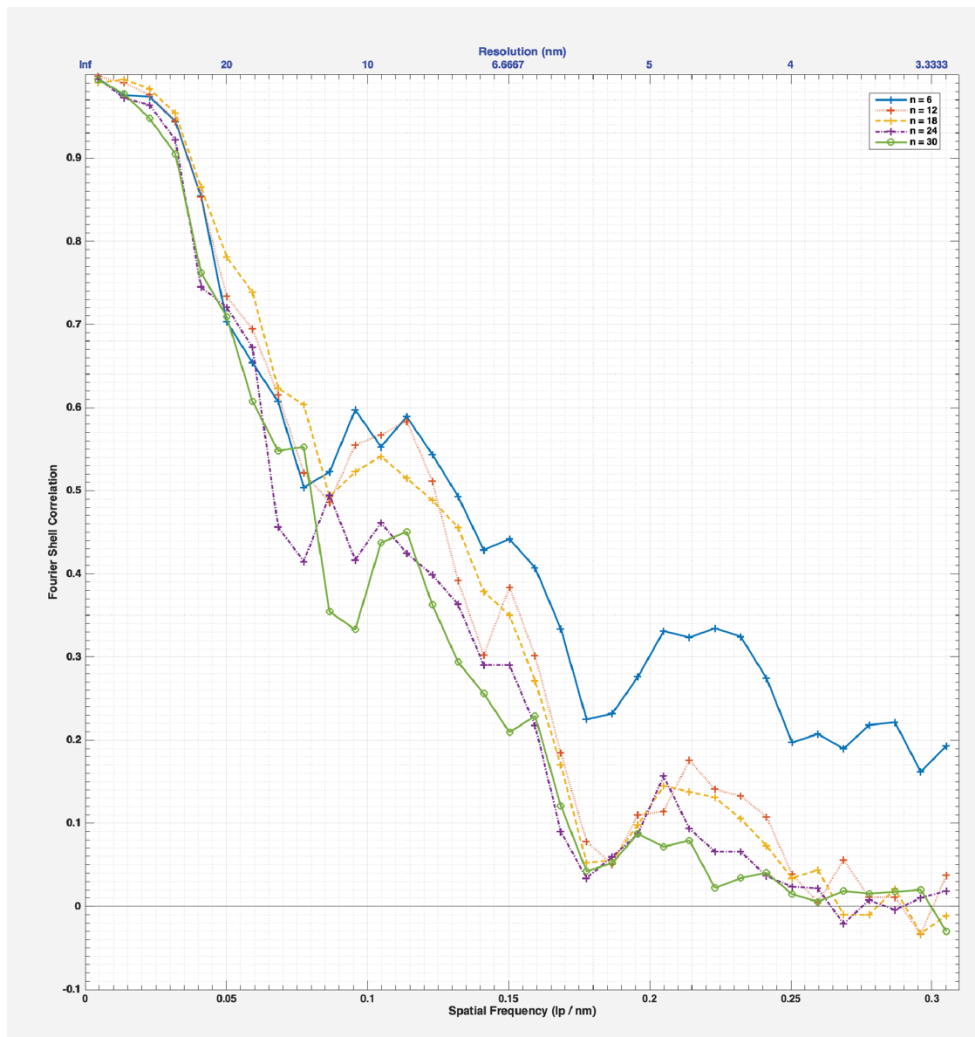

*H. pylori fliP\**

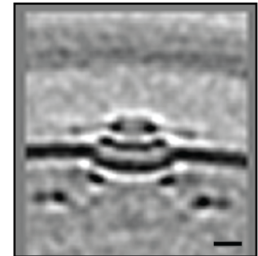

60

61 **Appendix Figure S2: FSC curve of the *H. pylori fliP\** MS-complex.**

62 FSC curve of the subtomogram average of the MS-complex of *H. pylori fliP\** (shown on the right).

63 The different colored curves represent different particle subsets. Scale bar is 10 nm.

64

65

66

67

68

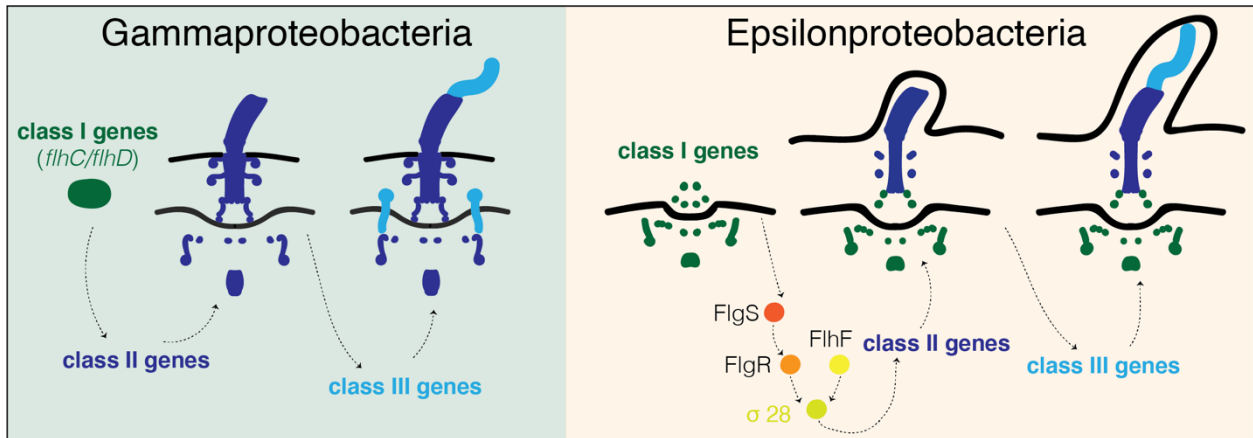

69

70 **Appendix Figure S3: Expression of flagellar genes in Gamma- and Epsilonproteobacteria.**

71 A schematic representation of the different regulation of the transcription of flagellar genes in  
 72 Gammaproteobacteria and Epsilonproteobacteria. Schematic based on (Gilbreath *et al*, 2011;  
 73 Lertsethtakarn *et al*, 2011).

74

75

76

77

78

79

80

81

82

83

84

85

86

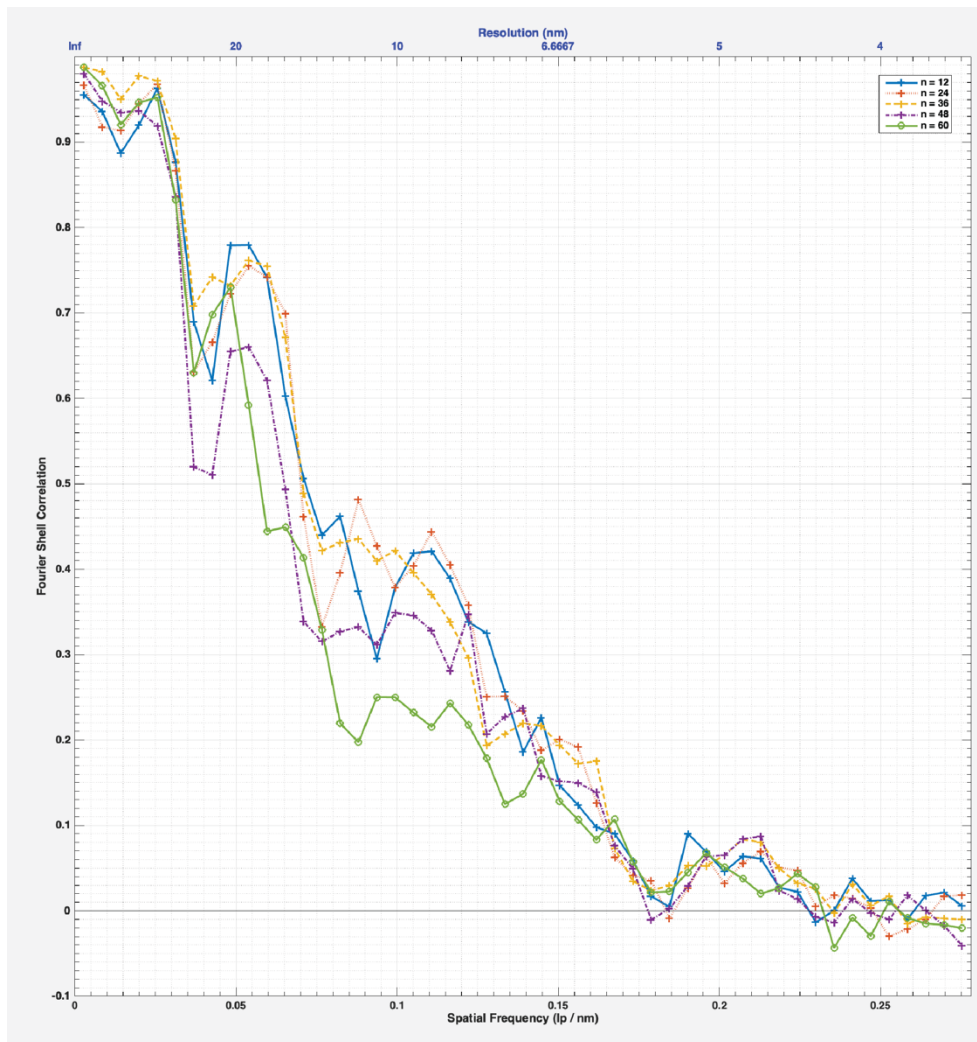

*H. pylori*  $\Delta$ *fliM* *fliP*\*

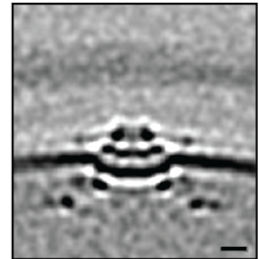

87

88 **Appendix Figure S4: FSC curve of the *H. pylori*  $\Delta$ *fliM* *fliP*\* MS-complex.**

89 FSC curve of the subtomogram average of the MS-complex of *H. pylori*  $\Delta$ *fliM* *fliP*\* (shown on  
90 the right). The different colored curves represent different particle subsets. Scale bar is 10 nm.

91

92

93

94

95

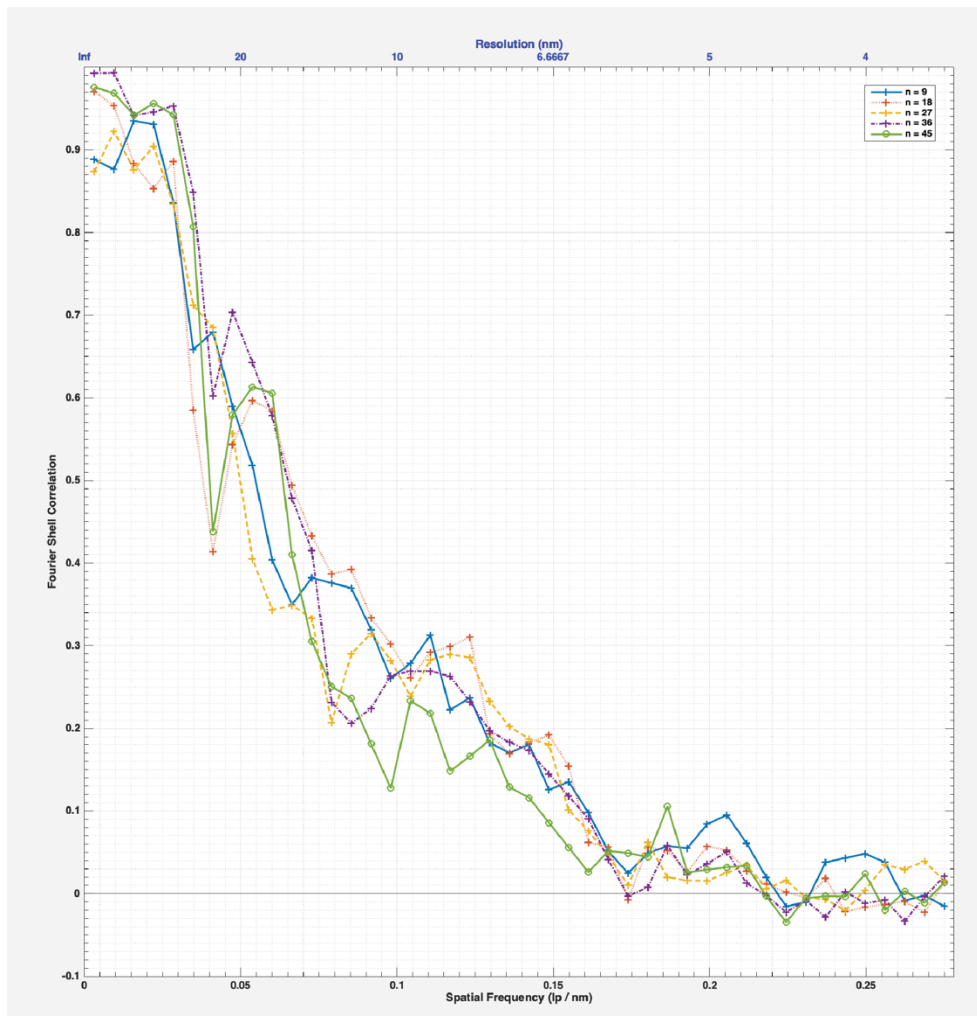

*H. pylori*  $\Delta fliQ$  *fliP*\*

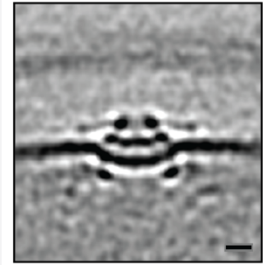

96

97 **Appendix Figure S5: FSC curve of the *H. pylori*  $\Delta fliQ$  *fliP*\* MS-complex.**

98 FSC curve of the subtomogram average of the MS-complex of *H. pylori*  $\Delta fliQ$  *fliP*\* (shown on  
99 the right). The different colored curves represent different particle subsets. Scale bar is 10 nm.

100

101

102

103

104

105

106  
107  
108  
109  
110  
111  
112  
113  
114  
115  
116  
117  
118  
119  
120  
121  
122  
123  
124  
125  
126  
127  
128

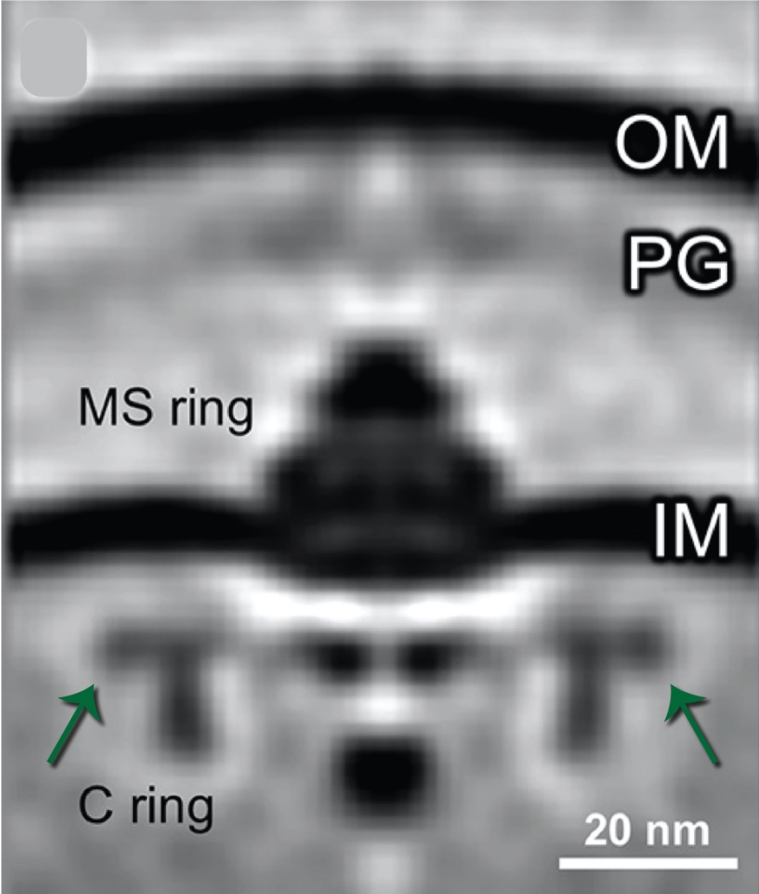

**Appendix Figure S6: A cytoplasmic ring surrounds the C-ring in the C-complex of *P. aeruginosa*.** A central slice through the STA of the C-complex of *P. aeruginosa* adapted from (Zhu *et al*, 2019). Green arrows point to a ~56-57-nm cytoplasmic ring surrounding the upper part of the C-ring occupied by FliG.



129 **References:**

130

131 Gilbreath JJ, Cody WL, Merrell DS & Hendrixson DR (2011) Change Is Good: Variations in  
132 Common Biological Mechanisms in the Epsilonproteobacterial Genera *Campylobacter*  
133 and *Helicobacter*. *Microbiology and Molecular Biology Reviews* 75: 84–132

134 Lertsethtakarn P, Ottemann KM & Hendrixson DR (2011) Motility and Chemotaxis in  
135 *Campylobacter* and *Helicobacter*. *Annual Review of Microbiology* 65: 389–410

136 Zhu S, Schniederberend M, Zhitnitsky D, Jain R, Galán JE, Kazmierczak BI & Liu J (2019) *In*  
137 *Situ* Structures of Polar and Lateral Flagella Revealed by Cryo-Electron Tomography.  
138 *Journal of Bacteriology* 201

139
